# Supplementary material for: Pt-Fe-Co Ternary Metal Single Atom Catalyst for toward High Efficiency Alkaline Oxygen Reduction Reaction
Source: MDPI journal article supplement (doi:10.3390/en16093684), 2023-04-25
Supplement: s1 [file s1]

## Supporting Information

### Pt-Fe-Co ternary metal atoms doping catalyst for toward high efficiency alkaline oxygen reduction reaction

Ruimin Zhang<sup>a</sup>, Ke Wang<sup>a</sup>, Peng Wang<sup>a,\*</sup>, Yan He<sup>a,\*</sup>, Zhiming Liu<sup>a,\*</sup>

<sup>a</sup> College of Electromechanical Engineering, Shandong Engineering Laboratory for Preparation and Application of High-Performance Carbon-Materials, Qingdao University of Science & Technology, Qingdao 266061, China;

\*To whom correspondence should be addressed.

E-mail: [pengwangmse@qust.edu.cn](mailto:pengwangmse@qust.edu.cn); [heyan@qust.edu.cn](mailto:heyan@qust.edu.cn); [zmliu@qust.edu.cn](mailto:zmliu@qust.edu.cn).

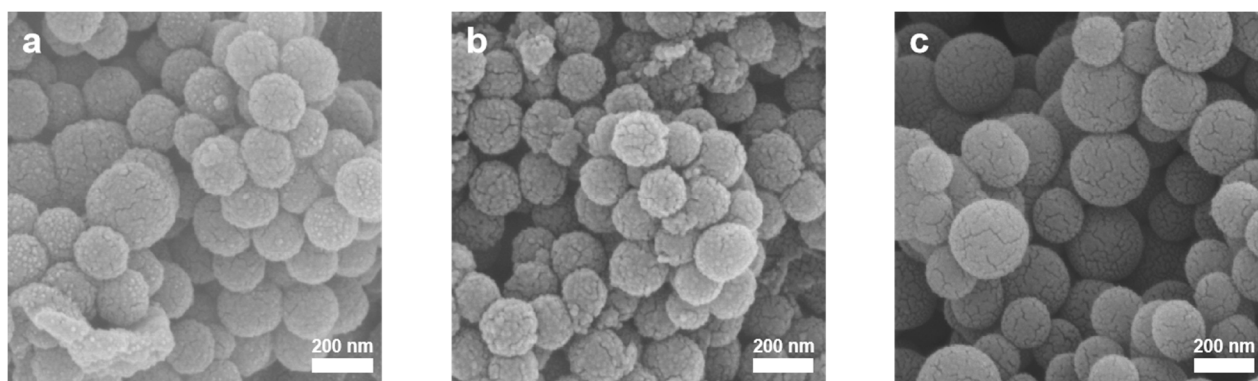

**Figure S1.** The SEM images of comparison samples. (a) Pt/N-C, N-C, (b) Fe, Co/N-C, (c) N-C

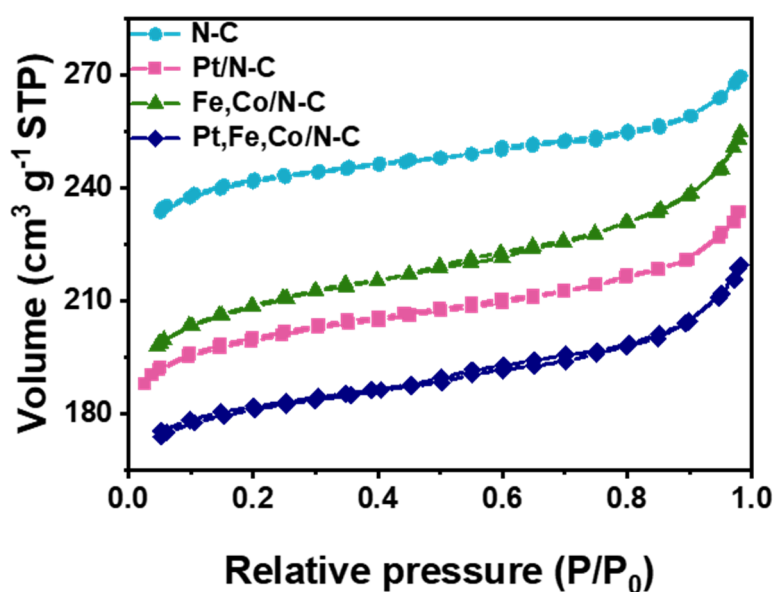

**Figure S2.** Nitrogen adsorption-desorption isotherms of Pt, Fe, Co/N-C and Fe, Co/N-C, Pt/N-C, N-C

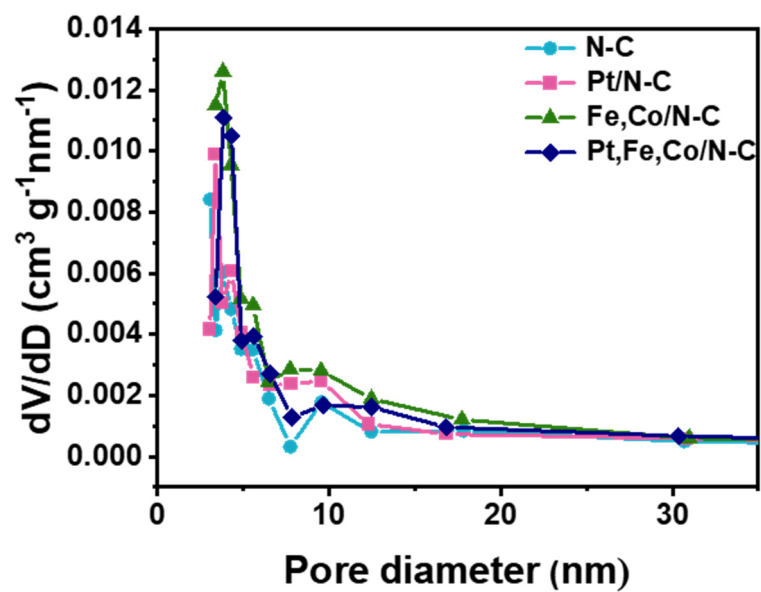

Figure S3. Pore size distributions of Pt, Fe, Co/N-C and Fe, Co/N-C, Pt/N-C, N-C.

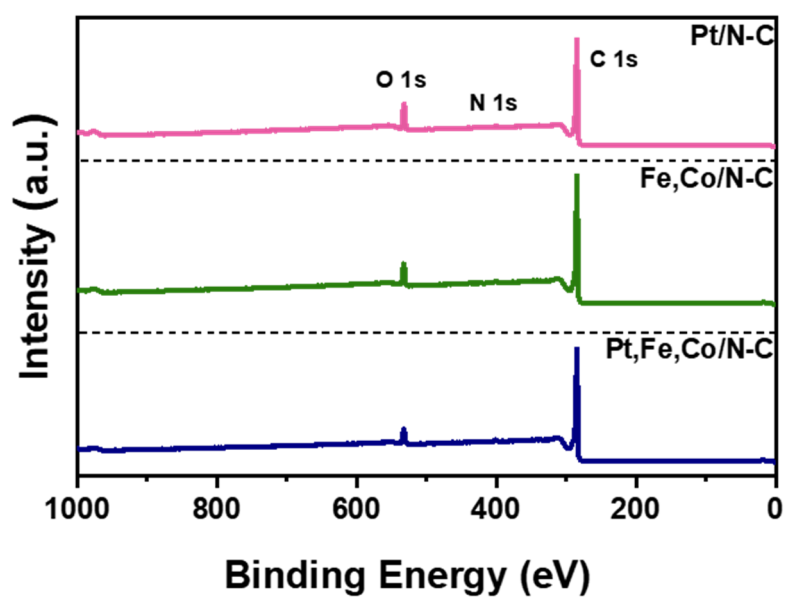

Figure S4. XPS survey spectrum of Pt, Fe, Co/N-C and Fe, Co/N-C, Pt/N-C.

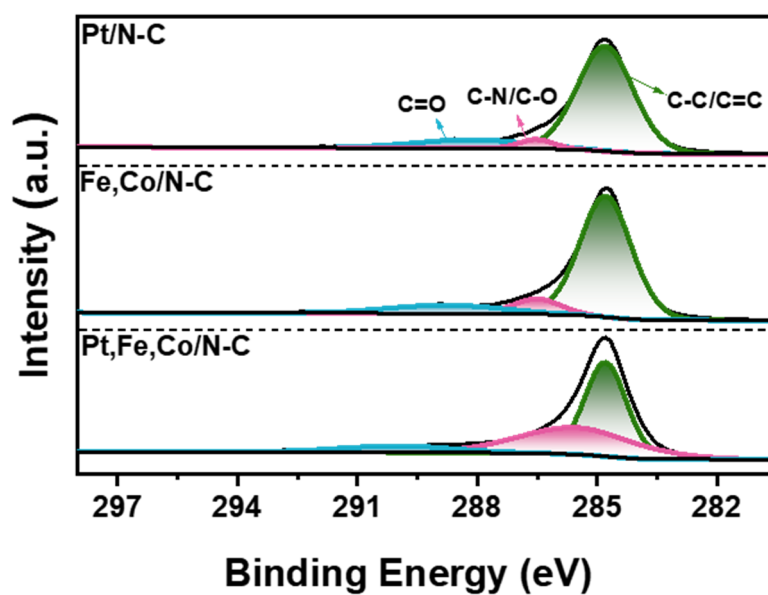

Figure S5. XPS C 1s spectra of Pt, Fe, Co/N-C and Fe, Co/N-C, Pt/N-C.

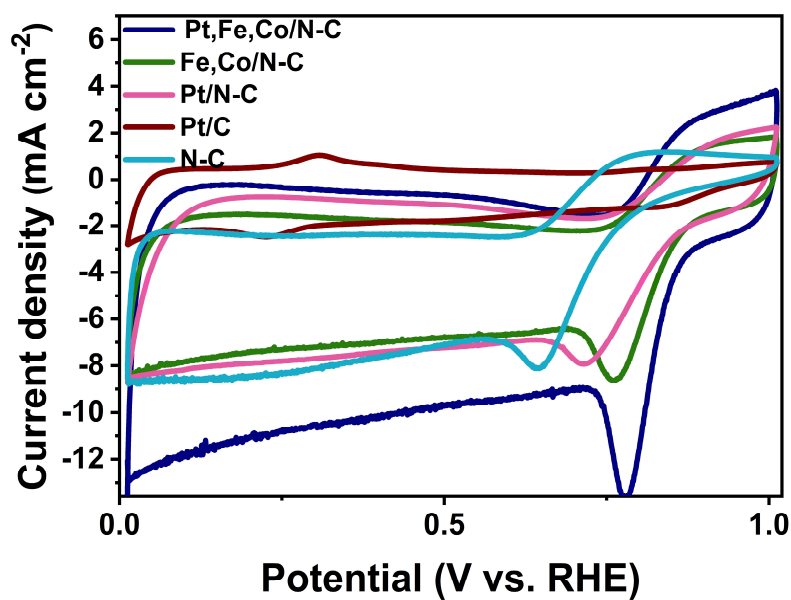

Figure S6. CV curves of Pt,Fe, Co/N-C , Fe, Co/N-C, Pt/N-C, N-C and Pt/C in an O<sub>2</sub>-saturated 0.1 M KOH solution

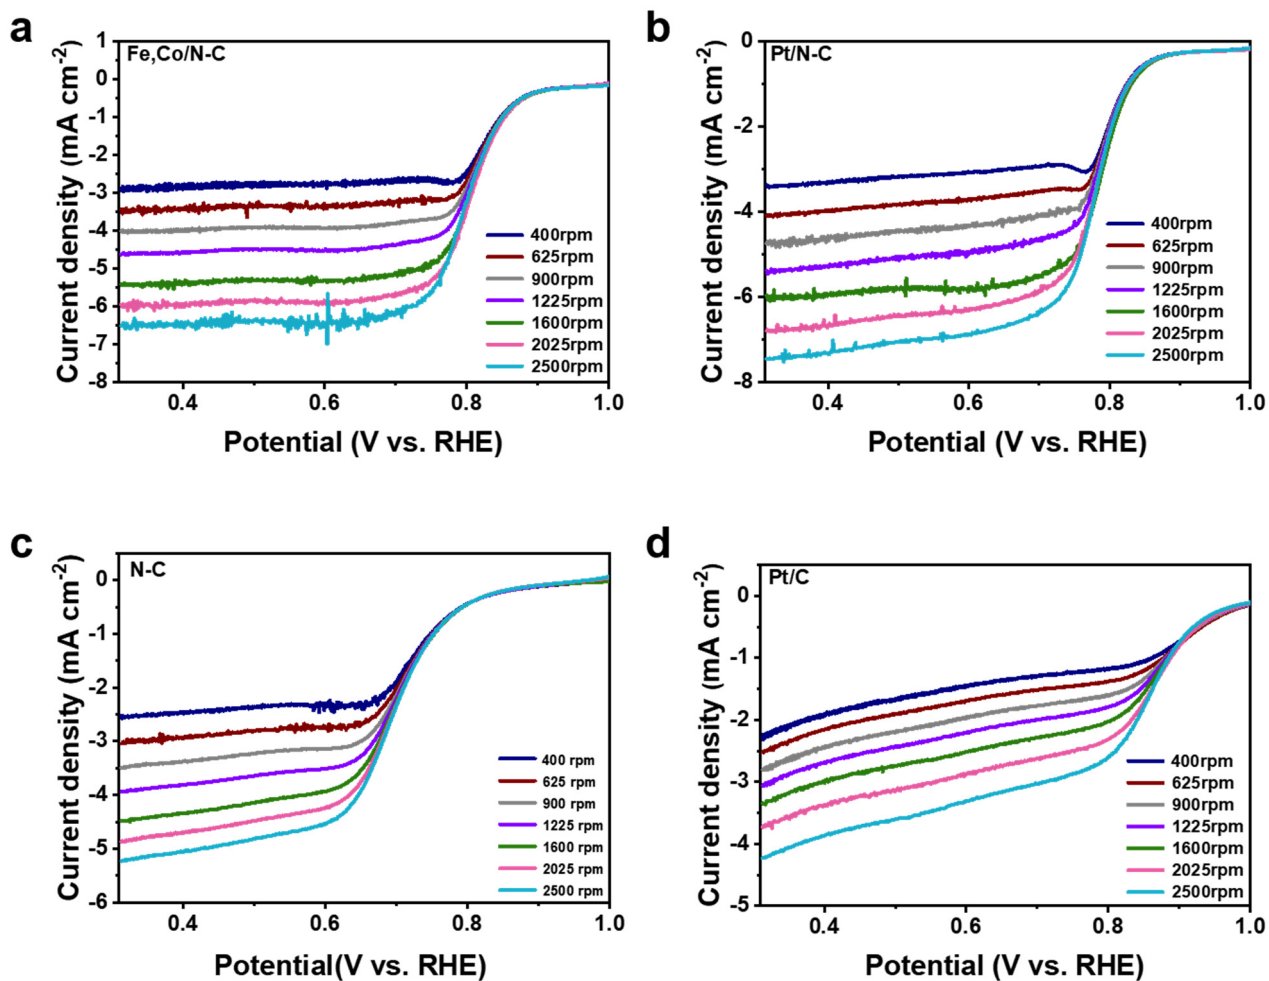

Figure S7. ORR polarization curves at different rotating rates of comparison samples. (a) Fe, Co/N-C, (b) Pt/N-C (c) N-C and (d) Pt/C

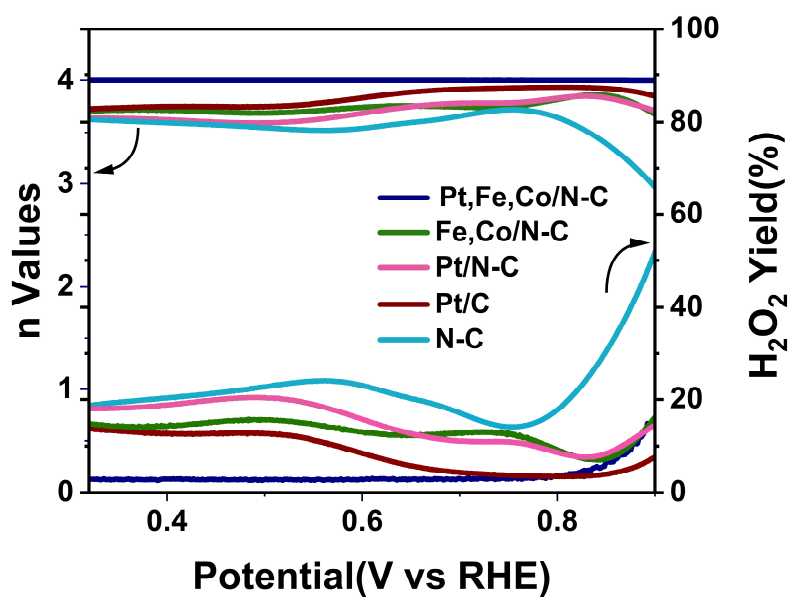

Figure S8. The number of transferred electrons and H<sub>2</sub>O<sub>2</sub> yield of Pt, Fe, Co/N-C, Fe, Co/N-C, Pt/N-C, Pt/C and N-C

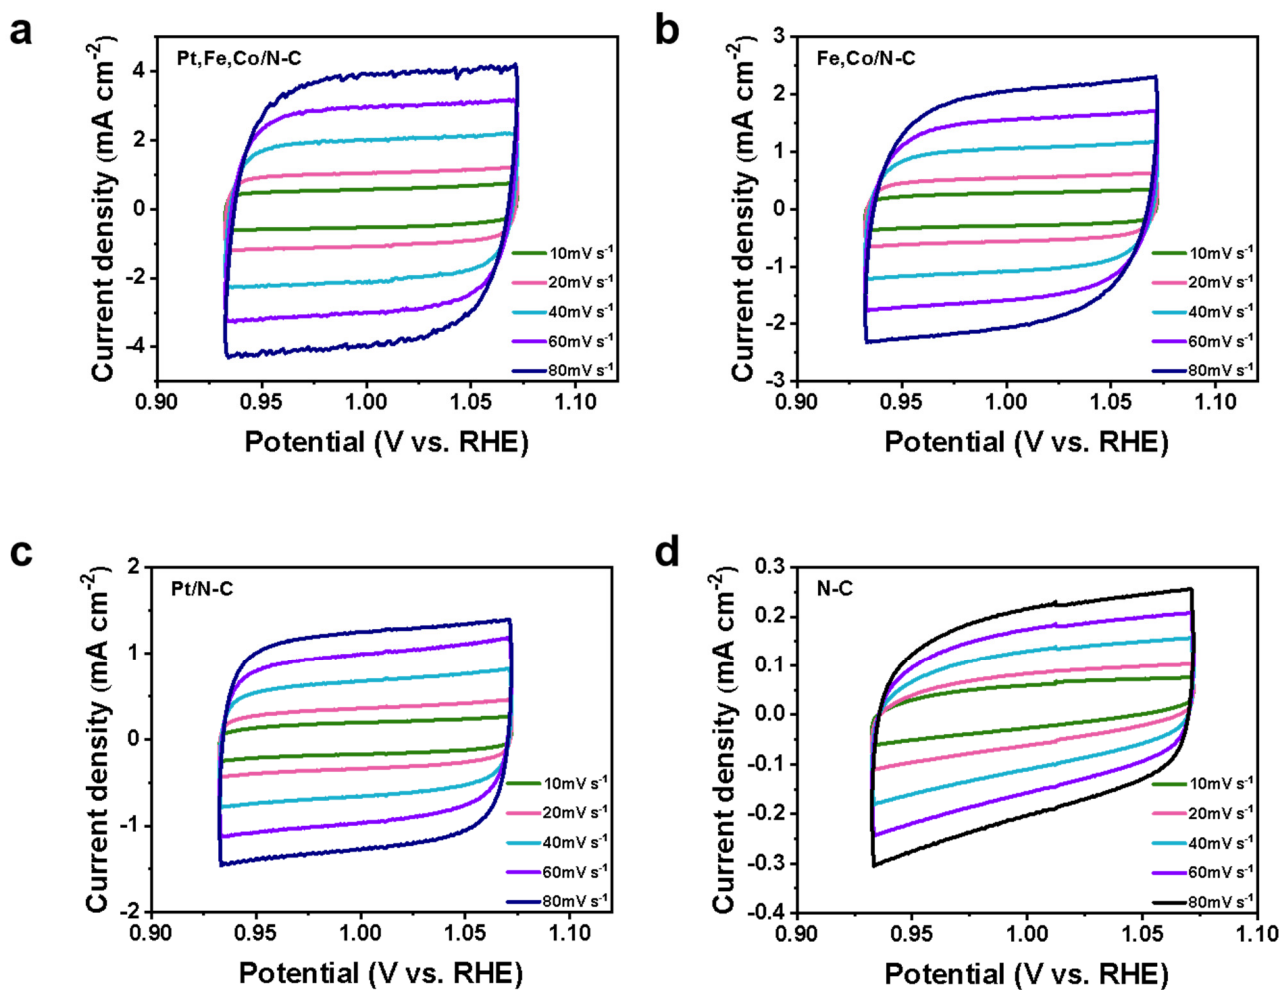

Figure S9. Scan rate dependence of current densities in CV curves for different samples. (a) Pt, Fe, Co/N-C, (b) Fe, Co/N-C, (c) Pt/N-C and (d) N-C.

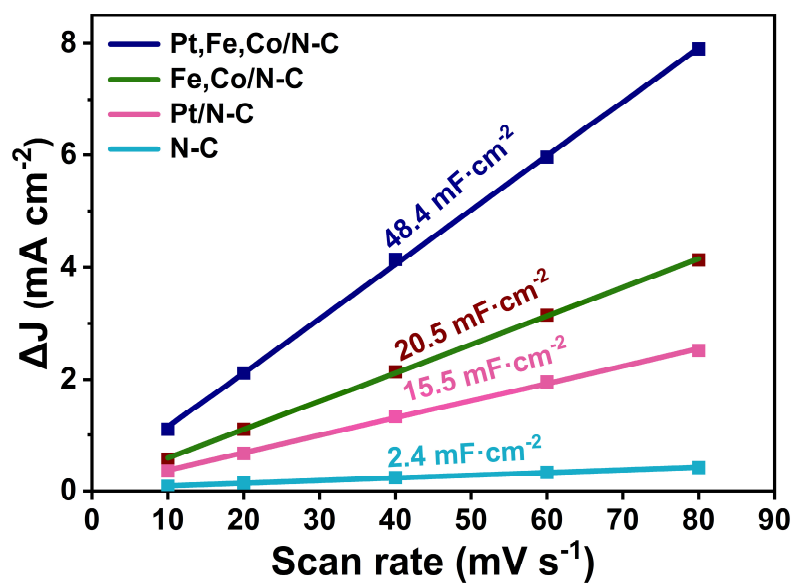

Figure S10. The  $C_{dl}$  curves of Pt, Fe, Co/N-C, Fe, Co/N-C, Pt/N-C, and N-C

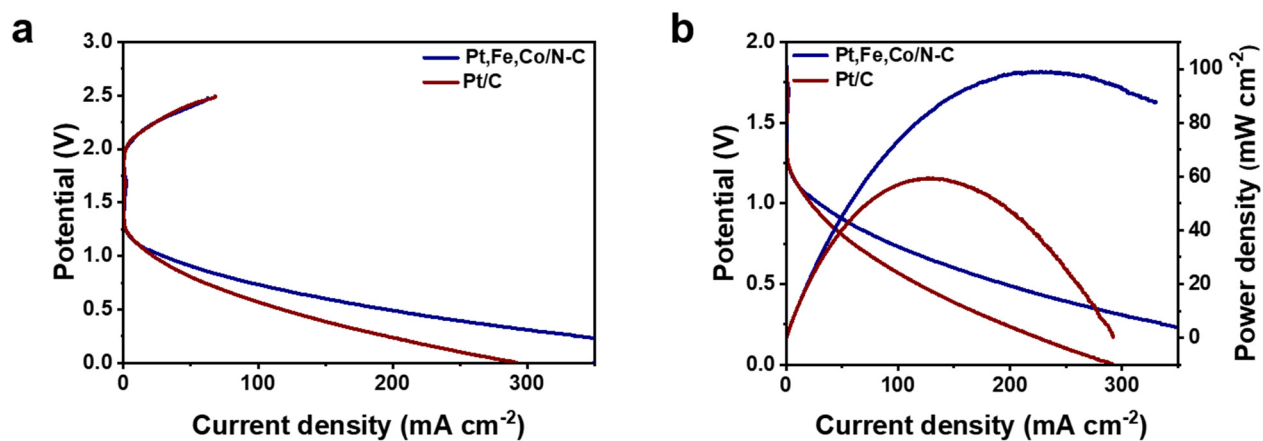

**Figure S11.** (a) Charge-discharge curves of Pt, Fe, Co/N-C and 20wt% Pt/C; (b) Discharge polarization and power density curves of Pt, Fe, Co/N-C and 20wt% Pt/C

**Table S1.** Materials elemental composition

| Sample         | C (at.%) | N (at.%) | Pt (at.%) | Fe (at.%) | Co (at.%) |
|----------------|----------|----------|-----------|-----------|-----------|
| Pt/N-C         | 98.37    | 1.17     | 0.07      | 0.24      | 0.15      |
| Fe, Co/N-C     | 98.54    | 1.05     | 0         | 0.22      | 0.19      |
| Pt, Fe, Co/N-C | 98.06    | 1.48     | 0.04      | 0.21      | 0.21      |
