# Supplementary material for: Pt-Fe-Co Ternary Metal Single Atom Catalyst for toward High Efficiency Alkaline Oxygen Reduction Reaction
Source: MDPI journal article supplement (doi:10.3390/en16093684), 2023-04-25
Supplement: s1 [file s1]

Archive with 1 entries (1 files):
- energies-2330407-supplementary.pdf
